# Supplementary material for: Transcriptomic analysis highlights cochlear inflammation associated with age-related hearing loss in C57BL/6 mice using next generation sequencing
Source: PeerJ. 2020 Aug 19;8:e9737. doi: 10.7717/peerj.9737 (PMC7443093; doi:10.7717/peerj.9737)
Supplement: Supplemental Information 1 [file peerj-08-9737-s001.xlsx]

## Sheet: GO enrichment of the total DEGs
GO enrichment of the total DEGs
GO_accession	Description	Term_type	Adjusted_pValue
GO:0006952	defense response	biological_process	5.5851e-25
GO:0045087	innate immune response	biological_process	1.5512e-24
GO:0006955	immune response	biological_process	8.1589e-21
GO:0002376	immune system process	biological_process	5.1679e-20
GO:0051707	response to other organism	biological_process	7.4591e-20
GO:0034097	response to cytokine stimulus	biological_process	1.5212e-19
GO:0009607	response to biotic stimulus	biological_process	2.0463e-18
GO:0035456	response to interferon-beta	biological_process	2.841e-17
GO:0051704	multi-organism process	biological_process	4.4685e-16
GO:0070887	cellular response to chemical stimulus	biological_process	1.3148e-14
GO:0010033	response to organic substance	biological_process	1.0345e-13
GO:0035458	cellular response to interferon-beta	biological_process	1.8079e-13
GO:0071345	cellular response to cytokine stimulus	biological_process	2.5035e-13
GO:0071310	cellular response to organic substance	biological_process	2.6795e-13
GO:0034341	response to interferon-gamma	biological_process	1.9002e-12
GO:0051239	regulation of multicellular organismal process	biological_process	5.3515e-12
GO:0006950	response to stress	biological_process	8.5377e-12
GO:0048002	antigen processing and presentation of peptide antigen	biological_process	1.6438e-11
GO:0002252	immune effector process	biological_process	7.5139e-11
GO:0002682	regulation of immune system process	biological_process	1.7069e-10
GO:0009615	response to virus	biological_process	1.7069e-10
GO:0051049	regulation of transport	biological_process	2.4221e-10
GO:0032879	regulation of localization	biological_process	2.4221e-10
GO:0044459	plasma membrane part	cellular_component	3.1471e-10
GO:0019882	antigen processing and presentation	biological_process	4.8106e-10
GO:0050776	regulation of immune response	biological_process	1.3997e-09
GO:0002684	positive regulation of immune system process	biological_process	1.3997e-09
GO:0042611	MHC protein complex	cellular_component	2.1509e-09
GO:0051607	defense response to virus	biological_process	4.206e-09
GO:0009617	response to bacterium	biological_process	6.4462e-09
GO:0031347	regulation of defense response	biological_process	1.0945e-08
GO:0005576	extracellular region	cellular_component	1.4346e-08
GO:0044699	single-organism process	biological_process	1.7708e-08
GO:0045202	synapse	cellular_component	2.513e-08
GO:0022610	biological adhesion	biological_process	3.5502e-08
GO:0005515	protein binding	molecular_function	7.1045e-08
GO:0048731	system development	biological_process	7.2851e-08
GO:0035637	multicellular organismal signaling	biological_process	8.0757e-08
GO:0045088	regulation of innate immune response	biological_process	8.7802e-08
GO:0019226	transmission of nerve impulse	biological_process	1.5496e-07
GO:0007267	cell-cell signaling	biological_process	1.6117e-07
GO:0009986	cell surface	cellular_component	1.6913e-07
GO:0050896	response to stimulus	biological_process	1.8833e-07
GO:0043269	regulation of ion transport	biological_process	2.1464e-07
GO:0051179	localization	biological_process	2.3451e-07
GO:0031349	positive regulation of defense response	biological_process	2.4592e-07
GO:0050778	positive regulation of immune response	biological_process	3.0536e-07
GO:0048518	positive regulation of biological process	biological_process	3.949e-07
GO:0044421	extracellular region part	cellular_component	3.949e-07
GO:0071944	cell periphery	cellular_component	3.949e-07
GO:0001817	regulation of cytokine production	biological_process	4.3055e-07
GO:0006810	transport	biological_process	4.6143e-07
GO:0005886	plasma membrane	cellular_component	4.6389e-07
GO:2000026	regulation of multicellular organismal development	biological_process	5.289e-07
GO:0031226	intrinsic to plasma membrane	cellular_component	5.7501e-07
GO:0030424	axon	cellular_component	6.9131e-07
GO:0044765	single-organism transport	biological_process	6.9131e-07
GO:0044406	adhesion to host	biological_process	7.4416e-07
GO:0051825	adhesion to other organism involved in symbiotic interaction	biological_process	7.4416e-07
GO:0051050	positive regulation of transport	biological_process	7.5605e-07
GO:0044456	synapse part	cellular_component	7.5605e-07
GO:0002237	response to molecule of bacterial origin	biological_process	7.5605e-07
GO:0044763	single-organism cellular process	biological_process	8.8852e-07
GO:0032496	response to lipopolysaccharide	biological_process	8.8852e-07
GO:0042832	defense response to protozoan	biological_process	1.3298e-06
GO:0071346	cellular response to interferon-gamma	biological_process	1.4421e-06
GO:0001816	cytokine production	biological_process	1.4421e-06
GO:0051234	establishment of localization	biological_process	1.9413e-06
GO:0005615	extracellular space	cellular_component	2.2185e-06
GO:0035455	response to interferon-alpha	biological_process	2.2727e-06
GO:0042605	peptide antigen binding	molecular_function	2.6208e-06
GO:0042391	regulation of membrane potential	biological_process	2.6712e-06
GO:0002474	antigen processing and presentation of peptide antigen via MHC class I	biological_process	2.8071e-06
GO:0045089	positive regulation of innate immune response	biological_process	2.8768e-06
GO:0033993	response to lipid	biological_process	2.9959e-06
GO:0005216	ion channel activity	molecular_function	3.1605e-06
GO:0001562	response to protozoan	biological_process	3.1889e-06
GO:0030670	phagocytic vesicle membrane	cellular_component	3.3095e-06
GO:0015267	channel activity	molecular_function	3.3114e-06
GO:0022803	passive transmembrane transporter activity	molecular_function	3.3114e-06
GO:0007155	cell adhesion	biological_process	3.3114e-06
GO:0005578	proteinaceous extracellular matrix	cellular_component	3.6166e-06
GO:0044425	membrane part	cellular_component	3.9305e-06
GO:0005887	integral to plasma membrane	cellular_component	3.9607e-06
GO:0031224	intrinsic to membrane	cellular_component	4.0893e-06
GO:0020005	symbiont-containing vacuole membrane	cellular_component	4.4671e-06
GO:0031982	vesicle	cellular_component	4.5657e-06
GO:0045335	phagocytic vesicle	cellular_component	4.679e-06
GO:0007275	multicellular organismal development	biological_process	5.2789e-06
GO:0022838	substrate-specific channel activity	molecular_function	5.7526e-06
GO:0044707	single-multicellular organism process	biological_process	6.1041e-06
GO:0051240	positive regulation of multicellular organismal process	biological_process	7.0007e-06
GO:0097458	neuron part	cellular_component	7.0007e-06
GO:0030054	cell junction	cellular_component	7.0007e-06
GO:0048856	anatomical structure development	biological_process	7.0262e-06
GO:0002478	antigen processing and presentation of exogenous peptide antigen	biological_process	8.738e-06
GO:0050793	regulation of developmental process	biological_process	9.7857e-06
GO:0002443	leukocyte mediated immunity	biological_process	1.0304e-05
GO:0042221	response to chemical stimulus	biological_process	1.1053e-05
GO:0033267	axon part	cellular_component	1.1053e-05
GO:0001819	positive regulation of cytokine production	biological_process	1.3359e-05
GO:0006811	ion transport	biological_process	1.4659e-05
GO:0060341	regulation of cellular localization	biological_process	1.6543e-05
GO:0044767	single-organism developmental process	biological_process	1.7611e-05
GO:0044403	symbiosis, encompassing mutualism through parasitism	biological_process	1.7611e-05
GO:0044419	interspecies interaction between organisms	biological_process	1.7611e-05
GO:0006812	cation transport	biological_process	1.7798e-05
GO:0051046	regulation of secretion	biological_process	2.2453e-05
GO:0010959	regulation of metal ion transport	biological_process	2.2826e-05
GO:0048513	organ development	biological_process	2.2826e-05
GO:0007268	synaptic transmission	biological_process	2.2826e-05
GO:0020003	symbiont-containing vacuole	cellular_component	2.3661e-05
GO:0016021	integral to membrane	cellular_component	2.5855e-05
GO:0042742	defense response to bacterium	biological_process	2.6786e-05
GO:0071219	cellular response to molecule of bacterial origin	biological_process	2.8846e-05
GO:0030001	metal ion transport	biological_process	3.1557e-05
GO:0051701	interaction with host	biological_process	3.8353e-05
GO:0031012	extracellular matrix	cellular_component	4.5529e-05
GO:1901700	response to oxygen-containing compound	biological_process	5.0857e-05
GO:0065008	regulation of biological quality	biological_process	5.1805e-05
GO:0043005	neuron projection	cellular_component	5.5466e-05
GO:0044304	main axon	cellular_component	5.8183e-05
GO:0032501	multicellular organismal process	biological_process	5.8346e-05
GO:0048584	positive regulation of response to stimulus	biological_process	5.885e-05
GO:0002819	regulation of adaptive immune response	biological_process	6.0313e-05
GO:0071222	cellular response to lipopolysaccharide	biological_process	6.6405e-05
GO:0002821	positive regulation of adaptive immune response	biological_process	7.005e-05
GO:0016020	membrane	cellular_component	7.0888e-05
GO:0002705	positive regulation of leukocyte mediated immunity	biological_process	7.1255e-05
GO:0009612	response to mechanical stimulus	biological_process	7.4214e-05
GO:0019884	antigen processing and presentation of exogenous antigen	biological_process	8.7334e-05
GO:0022836	gated channel activity	molecular_function	8.8339e-05
GO:0022839	ion gated channel activity	molecular_function	8.8339e-05
GO:0030666	endocytic vesicle membrane	cellular_component	9.1022e-05
GO:0015833	peptide transport	biological_process	9.2074e-05
GO:0001906	cell killing	biological_process	9.6116e-05
GO:0045071	negative regulation of viral genome replication	biological_process	9.9729e-05
GO:0005488	binding	molecular_function	0.00010674
GO:0002703	regulation of leukocyte mediated immunity	biological_process	0.00011067
GO:0001909	leukocyte mediated cytotoxicity	biological_process	0.00011309
GO:0050830	defense response to Gram-positive bacterium	biological_process	0.00012545
GO:0002449	lymphocyte mediated immunity	biological_process	0.00012606
GO:0031988	membrane-bounded vesicle	cellular_component	0.00014085
GO:0030154	cell differentiation	biological_process	0.000144
GO:0040011	locomotion	biological_process	0.00014437
GO:0046903	secretion	biological_process	0.00014606
GO:0002697	regulation of immune effector process	biological_process	0.00015772
GO:0071216	cellular response to biotic stimulus	biological_process	0.0001579
GO:0002758	innate immune response-activating signal transduction	biological_process	0.00016641
GO:0048522	positive regulation of cellular process	biological_process	0.0001688
GO:0042886	amide transport	biological_process	0.00017168
GO:0002504	antigen processing and presentation of peptide or polysaccharide antigen via MHC class II	biological_process	0.00017352
GO:0050900	leukocyte migration	biological_process	0.00018025
GO:0002824	positive regulation of adaptive immune response based on somatic recombination of immune receptors built from immunoglobulin superfamily domains	biological_process	0.0001917
GO:0032502	developmental process	biological_process	0.00022743
GO:0009628	response to abiotic stimulus	biological_process	0.00024301
GO:0030430	host cell cytoplasm	cellular_component	0.00024301
GO:0033655	host cell cytoplasm part	cellular_component	0.00024301
GO:0005201	extracellular matrix structural constituent	molecular_function	0.00024537
GO:0002483	antigen processing and presentation of endogenous peptide antigen	biological_process	0.00024537
GO:0043900	regulation of multi-organism process	biological_process	0.00026262
GO:0080134	regulation of response to stress	biological_process	0.00026481
GO:0002221	pattern recognition receptor signaling pathway	biological_process	0.00030393
GO:0002218	activation of innate immune response	biological_process	0.00030718
GO:0051270	regulation of cellular component movement	biological_process	0.00030874
GO:0034765	regulation of ion transmembrane transport	biological_process	0.00038063
GO:0046977	TAP binding	molecular_function	0.00038063
GO:0002253	activation of immune response	biological_process	0.00038673
GO:0042383	sarcolemma	cellular_component	0.00038673
GO:0043901	negative regulation of multi-organism process	biological_process	0.00041548
GO:0009605	response to external stimulus	biological_process	0.00042365
GO:0045110	intermediate filament bundle assembly	biological_process	0.00042469
GO:0001910	regulation of leukocyte mediated cytotoxicity	biological_process	0.00042643
GO:0042613	MHC class II protein complex	cellular_component	0.00044449
GO:0002683	negative regulation of immune system process	biological_process	0.00044449
GO:0045104	intermediate filament cytoskeleton organization	biological_process	0.00046119
GO:0040012	regulation of locomotion	biological_process	0.00046832
GO:0016337	cell-cell adhesion	biological_process	0.00046876
GO:0019883	antigen processing and presentation of endogenous antigen	biological_process	0.00049498
GO:0001730	2'-5'-oligoadenylate synthetase activity	molecular_function	0.00049502
GO:0016338	calcium-independent cell-cell adhesion	biological_process	0.00050277
GO:0034702	ion channel complex	cellular_component	0.000505
GO:0016477	cell migration	biological_process	0.00052079
GO:0002495	antigen processing and presentation of peptide antigen via MHC class II	biological_process	0.00052572
GO:0006928	cellular component movement	biological_process	0.00053486
GO:0045103	intermediate filament-based process	biological_process	0.00053981
GO:0042612	MHC class I protein complex	cellular_component	0.00054272
GO:0030881	beta-2-microglobulin binding	molecular_function	0.00056495
GO:0032940	secretion by cell	biological_process	0.00058563
GO:0043903	regulation of symbiosis, encompassing mutualism through parasitism	biological_process	0.00058563
GO:0043245	extraorganismal space	cellular_component	0.00058563
GO:0044215	other organism	cellular_component	0.00058563
GO:0044216	other organism cell	cellular_component	0.00058563
GO:0044217	other organism part	cellular_component	0.00058563
GO:0071621	granulocyte chemotaxis	biological_process	0.00059192
GO:0034762	regulation of transmembrane transport	biological_process	0.00069076
GO:0043270	positive regulation of ion transport	biological_process	0.00069076
GO:0034220	ion transmembrane transport	biological_process	0.00071357
GO:0048525	negative regulation of viral process	biological_process	0.00071357
GO:0002790	peptide secretion	biological_process	0.00075275
GO:0005198	structural molecule activity	molecular_function	0.00076765
GO:0048869	cellular developmental process	biological_process	0.0007933
GO:0033646	host intracellular part	cellular_component	0.00080498
GO:0043656	intracellular region of host	cellular_component	0.00080498
GO:0045597	positive regulation of cell differentiation	biological_process	0.0008223
GO:0034703	cation channel complex	cellular_component	0.00089811
GO:0007610	behavior	biological_process	0.00089811
GO:0003924	GTPase activity	molecular_function	0.00089811
GO:0002250	adaptive immune response	biological_process	0.00091015
GO:0002888	positive regulation of myeloid leukocyte mediated immunity	biological_process	0.00091301
GO:0050905	neuromuscular process	biological_process	0.00095461
GO:0001912	positive regulation of leukocyte mediated cytotoxicity	biological_process	0.00099083
GO:0007399	nervous system development	biological_process	0.0010204
GO:0031410	cytoplasmic vesicle	cellular_component	0.0010351
GO:0044463	cell projection part	cellular_component	0.0010642
GO:0045069	regulation of viral genome replication	biological_process	0.0010887
GO:0002822	regulation of adaptive immune response based on somatic recombination of immune receptors built from immunoglobulin superfamily domains	biological_process	0.0011191
GO:0045595	regulation of cell differentiation	biological_process	0.001127
GO:0071396	cellular response to lipid	biological_process	0.001127
GO:0015079	potassium ion transmembrane transporter activity	molecular_function	0.001127
GO:0051047	positive regulation of secretion	biological_process	0.0011391
GO:0008076	voltage-gated potassium channel complex	cellular_component	0.0011657
GO:0008021	synaptic vesicle	cellular_component	0.0011729
GO:0005783	endoplasmic reticulum	cellular_component	0.0011784
GO:0006954	inflammatory response	biological_process	0.0012507
GO:0044420	extracellular matrix part	cellular_component	0.0012507
GO:0005244	voltage-gated ion channel activity	molecular_function	0.0012777
GO:0022832	voltage-gated channel activity	molecular_function	0.0012777
GO:0032403	protein complex binding	molecular_function	0.0013521
GO:0002708	positive regulation of lymphocyte mediated immunity	biological_process	0.0013572
GO:0009611	response to wounding	biological_process	0.0013572
GO:0071774	response to fibroblast growth factor stimulus	biological_process	0.0014587
GO:0018995	host	cellular_component	0.0014587
GO:0033643	host cell part	cellular_component	0.0014587
GO:0043657	host cell	cellular_component	0.0014587
GO:0031341	regulation of cell killing	biological_process	0.0015389
GO:0002764	immune response-regulating signaling pathway	biological_process	0.0016072
GO:0048583	regulation of response to stimulus	biological_process	0.0016144
GO:0034705	potassium channel complex	cellular_component	0.0016324
GO:0043230	extracellular organelle	cellular_component	0.0016488
GO:0065010	extracellular membrane-bounded organelle	cellular_component	0.0016488
GO:0051094	positive regulation of developmental process	biological_process	0.001666
GO:0030593	neutrophil chemotaxis	biological_process	0.0016686
GO:0002460	adaptive immune response based on somatic recombination of immune receptors built from immunoglobulin superfamily domains	biological_process	0.0016686
GO:0030139	endocytic vesicle	cellular_component	0.0016779
GO:0002699	positive regulation of immune effector process	biological_process	0.0017081
GO:0050870	positive regulation of T cell activation	biological_process	0.0017081
GO:0042119	neutrophil activation	biological_process	0.0017081
GO:0044764	multi-organism cellular process	biological_process	0.0017081
GO:0002931	response to ischemia	biological_process	0.0018014
GO:0030595	leukocyte chemotaxis	biological_process	0.0018261
GO:0001794	type IIa hypersensitivity	biological_process	0.0019206
GO:0001796	regulation of type IIa hypersensitivity	biological_process	0.0019206
GO:0001798	positive regulation of type IIa hypersensitivity	biological_process	0.0019206
GO:0002445	type II hypersensitivity	biological_process	0.0019206
GO:0002892	regulation of type II hypersensitivity	biological_process	0.0019206
GO:0002894	positive regulation of type II hypersensitivity	biological_process	0.0019206
GO:0019079	viral genome replication	biological_process	0.0019588
GO:0003725	double-stranded RNA binding	molecular_function	0.0020093
GO:0048870	cell motility	biological_process	0.002036
GO:0051674	localization of cell	biological_process	0.002036
GO:0005911	cell-cell junction	cellular_component	0.0020759
GO:0050792	regulation of viral process	biological_process	0.0022885
GO:0005267	potassium channel activity	molecular_function	0.002303
GO:0006887	exocytosis	biological_process	0.002304
GO:0022843	voltage-gated cation channel activity	molecular_function	0.0023716
GO:0005102	receptor binding	molecular_function	0.0023779
GO:0050715	positive regulation of cytokine secretion	biological_process	0.0024956
GO:0005261	cation channel activity	molecular_function	0.0025745
GO:0009719	response to endogenous stimulus	biological_process	0.0025745
GO:0060627	regulation of vesicle-mediated transport	biological_process	0.0025871
GO:0015077	monovalent inorganic cation transmembrane transporter activity	molecular_function	0.0026987
GO:0007159	leukocyte cell-cell adhesion	biological_process	0.0027027
GO:0002706	regulation of lymphocyte mediated immunity	biological_process	0.002721
GO:0030315	T-tubule	cellular_component	0.002735
GO:0002274	myeloid leukocyte activation	biological_process	0.0028814
GO:0015672	monovalent inorganic cation transport	biological_process	0.0031703
GO:0005509	calcium ion binding	molecular_function	0.0032936
GO:0060760	positive regulation of response to cytokine stimulus	biological_process	0.003356
GO:0030072	peptide hormone secretion	biological_process	0.0034547
GO:0002687	positive regulation of leukocyte migration	biological_process	0.003518
GO:0014070	response to organic cyclic compound	biological_process	0.0035816
GO:0007229	integrin-mediated signaling pathway	biological_process	0.0036495
GO:0045123	cellular extravasation	biological_process	0.0036581
GO:0042608	T cell receptor binding	molecular_function	0.003725
GO:0016032	viral process	biological_process	0.0040107
GO:0042995	cell projection	cellular_component	0.0040738
GO:0032675	regulation of interleukin-6 production	biological_process	0.0043118
GO:0031343	positive regulation of cell killing	biological_process	0.0046332
GO:1901701	cellular response to oxygen-containing compound	biological_process	0.0046662
GO:0022891	substrate-specific transmembrane transporter activity	molecular_function	0.0047602
GO:0019886	antigen processing and presentation of exogenous peptide antigen via MHC class II	biological_process	0.0050199
GO:0019221	cytokine-mediated signaling pathway	biological_process	0.0051546
GO:0051924	regulation of calcium ion transport	biological_process	0.0052863
GO:0042129	regulation of T cell proliferation	biological_process	0.005364
GO:0055082	cellular chemical homeostasis	biological_process	0.0054763
GO:0042590	antigen processing and presentation of exogenous peptide antigen via MHC class I	biological_process	0.0058635
GO:0051899	membrane depolarization	biological_process	0.0064081
GO:0005249	voltage-gated potassium channel activity	molecular_function	0.0064979
GO:0032635	interleukin-6 production	biological_process	0.0065575
GO:0036230	granulocyte activation	biological_process	0.0065575
GO:0060052	neurofilament cytoskeleton organization	biological_process	0.0067418
GO:0031960	response to corticosteroid stimulus	biological_process	0.0067708
GO:0002224	toll-like receptor signaling pathway	biological_process	0.0068162
GO:0070062	extracellular vesicular exosome	cellular_component	0.0069971
GO:0032680	regulation of tumor necrosis factor production	biological_process	0.007185
GO:0050863	regulation of T cell activation	biological_process	0.0073152
GO:0002791	regulation of peptide secretion	biological_process	0.0073152
GO:0042110	T cell activation	biological_process	0.0073854
GO:0044700	single organism signaling	biological_process	0.0074153
GO:0040017	positive regulation of locomotion	biological_process	0.0076383
GO:0090087	regulation of peptide transport	biological_process	0.0076383
GO:0019865	immunoglobulin binding	molecular_function	0.0076383
GO:0006813	potassium ion transport	biological_process	0.0076383
GO:0023052	signaling	biological_process	0.0076383
GO:0017157	regulation of exocytosis	biological_process	0.0076638
GO:0071495	cellular response to endogenous stimulus	biological_process	0.0078302
GO:0014069	postsynaptic density	cellular_component	0.007895
GO:0097367	carbohydrate derivative binding	molecular_function	0.008024
GO:0060079	regulation of excitatory postsynaptic membrane potential	biological_process	0.0084247
GO:0048468	cell development	biological_process	0.0084247
GO:0071804	cellular potassium ion transport	biological_process	0.0084247
GO:0071805	potassium ion transmembrane transport	biological_process	0.0084247
GO:0032760	positive regulation of tumor necrosis factor production	biological_process	0.0084317
GO:0046873	metal ion transmembrane transporter activity	molecular_function	0.0084317
GO:0032640	tumor necrosis factor production	biological_process	0.0084645
GO:0022857	transmembrane transporter activity	molecular_function	0.0089743
GO:0038094	Fc-gamma receptor signaling pathway	biological_process	0.0092943
GO:0043025	neuronal cell body	cellular_component	0.0092943
GO:0030073	insulin secretion	biological_process	0.0092943
GO:0065007	biological regulation	biological_process	0.0092943
GO:2000145	regulation of cell motility	biological_process	0.0094967
GO:0071706	tumor necrosis factor superfamily cytokine production	biological_process	0.0098846
GO:0015075	ion transmembrane transporter activity	molecular_function	0.010384
GO:0055085	transmembrane transport	biological_process	0.010583
GO:0030673	axolemma	cellular_component	0.010692
GO:0044344	cellular response to fibroblast growth factor stimulus	biological_process	0.011
GO:0030097	hemopoiesis	biological_process	0.011121
GO:0010038	response to metal ion	biological_process	0.011128
GO:0019894	kinesin binding	molecular_function	0.011184
GO:0030334	regulation of cell migration	biological_process	0.011912
GO:0003001	generation of a signal involved in cell-cell signaling	biological_process	0.011912
GO:0023061	signal release	biological_process	0.011912
GO:0045639	positive regulation of myeloid cell differentiation	biological_process	0.012054
GO:0006836	neurotransmitter transport	biological_process	0.012205
GO:0044297	cell body	cellular_component	0.012656
GO:0016327	apicolateral plasma membrane	cellular_component	0.012656
GO:0035457	cellular response to interferon-alpha	biological_process	0.012656
GO:0050808	synapse organization	biological_process	0.013089
GO:0042098	T cell proliferation	biological_process	0.013089
GO:0016044	cellular membrane organization	biological_process	0.013089
GO:0030199	collagen fibril organization	biological_process	0.013197
GO:0007154	cell communication	biological_process	0.013256
GO:0071705	nitrogen compound transport	biological_process	0.013256
GO:0001505	regulation of neurotransmitter levels	biological_process	0.013479
GO:0032647	regulation of interferon-alpha production	biological_process	0.013479
GO:0016192	vesicle-mediated transport	biological_process	0.01392
GO:0022892	substrate-specific transporter activity	molecular_function	0.014239
GO:0005581	collagen	cellular_component	0.014285
GO:0031214	biomineral tissue development	biological_process	0.014597
GO:0001914	regulation of T cell mediated cytotoxicity	biological_process	0.014597
GO:0044708	single-organism behavior	biological_process	0.01493
GO:0060078	regulation of postsynaptic membrane potential	biological_process	0.015027
GO:0030003	cellular cation homeostasis	biological_process	0.015196
GO:0051146	striated muscle cell differentiation	biological_process	0.015388
GO:0010243	response to organonitrogen compound	biological_process	0.015388
GO:0044325	ion channel binding	molecular_function	0.015479
GO:0009725	response to hormone stimulus	biological_process	0.016051
GO:0051272	positive regulation of cellular component movement	biological_process	0.016523
GO:0050707	regulation of cytokine secretion	biological_process	0.016698
GO:0022008	neurogenesis	biological_process	0.016698
GO:0034340	response to type I interferon	biological_process	0.016698
GO:0032607	interferon-alpha production	biological_process	0.016698
GO:0002757	immune response-activating signal transduction	biological_process	0.017411
GO:0097479	synaptic vesicle localization	biological_process	0.017657
GO:0048534	hematopoietic or lymphoid organ development	biological_process	0.017903
GO:0001913	T cell mediated cytotoxicity	biological_process	0.018031
GO:0050890	cognition	biological_process	0.018624
GO:0045321	leukocyte activation	biological_process	0.01863
GO:0032020	ISG15-protein conjugation	biological_process	0.018932
GO:0005797	Golgi medial cisterna	cellular_component	0.019167
GO:0042116	macrophage activation	biological_process	0.019569
GO:0050542	icosanoid binding	molecular_function	0.019708
GO:0050544	arachidonic acid binding	molecular_function	0.019708
GO:1901567	fatty acid derivative binding	molecular_function	0.019708
GO:0005883	neurofilament	cellular_component	0.019718
GO:0002579	positive regulation of antigen processing and presentation	biological_process	0.020014
GO:0002283	neutrophil activation involved in immune response	biological_process	0.020055
GO:0005583	fibrillar collagen	cellular_component	0.020153
GO:0003828	alpha-N-acetylneuraminate alpha-2,8-sialyltransferase activity	molecular_function	0.020422
GO:0002685	regulation of leukocyte migration	biological_process	0.020422
GO:0001775	cell activation	biological_process	0.020553
GO:0002693	positive regulation of cellular extravasation	biological_process	0.021243
GO:0043113	receptor clustering	biological_process	0.021333
GO:0055080	cation homeostasis	biological_process	0.021333
GO:2001222	regulation of neuron migration	biological_process	0.021333
GO:0072507	divalent inorganic cation homeostasis	biological_process	0.021333
GO:0005215	transporter activity	molecular_function	0.021375
GO:0045109	intermediate filament organization	biological_process	0.021375
GO:0060326	cell chemotaxis	biological_process	0.021503
GO:0045351	type I interferon biosynthetic process	biological_process	0.021747
GO:0006873	cellular ion homeostasis	biological_process	0.021747
GO:0009897	external side of plasma membrane	cellular_component	0.022093
GO:0050714	positive regulation of protein secretion	biological_process	0.02223
GO:0019864	IgG binding	molecular_function	0.022468
GO:0019863	IgE binding	molecular_function	0.022737
GO:0005525	GTP binding	molecular_function	0.022925
GO:0019763	immunoglobulin receptor activity	molecular_function	0.023006
GO:0019228	regulation of action potential in neuron	biological_process	0.023385
GO:0001508	regulation of action potential	biological_process	0.023885
GO:1902107	positive regulation of leukocyte differentiation	biological_process	0.024159
GO:0046718	viral entry into host cell	biological_process	0.024159
GO:0071407	cellular response to organic cyclic compound	biological_process	0.024168
GO:0005231	excitatory extracellular ligand-gated ion channel activity	molecular_function	0.024168
GO:0007611	learning or memory	biological_process	0.024283
GO:0070838	divalent metal ion transport	biological_process	0.024402
GO:0006875	cellular metal ion homeostasis	biological_process	0.024466
GO:0030507	spectrin binding	molecular_function	0.024672
GO:0051384	response to glucocorticoid stimulus	biological_process	0.025194
GO:0051960	regulation of nervous system development	biological_process	0.02638
GO:0072678	T cell migration	biological_process	0.026604
GO:0050670	regulation of lymphocyte proliferation	biological_process	0.026604
GO:2000147	positive regulation of cell motility	biological_process	0.026709
GO:0032398	MHC class Ib protein complex	cellular_component	0.0271
GO:0072511	divalent inorganic cation transport	biological_process	0.027598
GO:0005539	glycosaminoglycan binding	molecular_function	0.027724
GO:0032944	regulation of mononuclear cell proliferation	biological_process	0.027766
GO:0007613	memory	biological_process	0.028283
GO:0061024	membrane organization	biological_process	0.028283
GO:0042277	peptide binding	molecular_function	0.028604
GO:0032101	regulation of response to external stimulus	biological_process	0.028731
GO:0003015	heart process	biological_process	0.029136
GO:0055065	metal ion homeostasis	biological_process	0.030039
GO:0016328	lateral plasma membrane	cellular_component	0.030099
GO:0048545	response to steroid hormone stimulus	biological_process	0.030099
GO:0048306	calcium-dependent protein binding	molecular_function	0.030099
GO:0050543	icosatetraenoic acid binding	molecular_function	0.030235
GO:0015844	monoamine transport	biological_process	0.030409
GO:0009914	hormone transport	biological_process	0.030826
GO:0051928	positive regulation of calcium ion transport	biological_process	0.030826
GO:0051128	regulation of cellular component organization	biological_process	0.030898
GO:0032103	positive regulation of response to external stimulus	biological_process	0.031113
GO:0015276	ligand-gated ion channel activity	molecular_function	0.031113
GO:0022834	ligand-gated channel activity	molecular_function	0.031113
GO:0014704	intercalated disc	cellular_component	0.031758
GO:0031225	anchored to membrane	cellular_component	0.031889
GO:1901698	response to nitrogen compound	biological_process	0.031889
GO:0030260	entry into host cell	biological_process	0.031893
GO:0044409	entry into host	biological_process	0.031893
GO:0051806	entry into cell of other organism involved in symbiotic interaction	biological_process	0.031893
GO:0051828	entry into other organism involved in symbiotic interaction	biological_process	0.031893
GO:0052126	movement in host environment	biological_process	0.031893
GO:0052192	movement in environment of other organism involved in symbiotic interaction	biological_process	0.031893
GO:0006935	chemotaxis	biological_process	0.032034
GO:0097118	neuroligin clustering	biological_process	0.032326
GO:0031663	lipopolysaccharide-mediated signaling pathway	biological_process	0.033443
GO:0042330	taxis	biological_process	0.033486
GO:0019885	antigen processing and presentation of endogenous peptide antigen via MHC class I	biological_process	0.033486
GO:0090276	regulation of peptide hormone secretion	biological_process	0.033486
GO:0033693	neurofilament bundle assembly	biological_process	0.033946
GO:0045105	intermediate filament polymerization or depolymerization	biological_process	0.033946
GO:0060053	neurofilament cytoskeleton	cellular_component	0.034159
GO:0030136	clathrin-coated vesicle	cellular_component	0.034391
GO:0072503	cellular divalent inorganic cation homeostasis	biological_process	0.034391
GO:0002456	T cell mediated immunity	biological_process	0.034746
GO:0002885	positive regulation of hypersensitivity	biological_process	0.03507
GO:0050777	negative regulation of immune response	biological_process	0.035939
GO:0008283	cell proliferation	biological_process	0.036025
GO:0060048	cardiac muscle contraction	biological_process	0.036277
GO:0001774	microglial cell activation	biological_process	0.036545
GO:0022890	inorganic cation transmembrane transporter activity	molecular_function	0.037003
GO:0051648	vesicle localization	biological_process	0.037003
GO:0070663	regulation of leukocyte proliferation	biological_process	0.037838
GO:0001916	positive regulation of T cell mediated cytotoxicity	biological_process	0.038608
GO:0070821	tertiary granule membrane	cellular_component	0.039177
GO:0046688	response to copper ion	biological_process	0.039219
GO:0097285	cell-type specific apoptotic process	biological_process	0.03969
GO:0005584	collagen type I	cellular_component	0.03969
GO:0050867	positive regulation of cell activation	biological_process	0.039818
GO:0043235	receptor complex	cellular_component	0.03999
GO:0070167	regulation of biomineral tissue development	biological_process	0.040941
GO:0034163	regulation of toll-like receptor 9 signaling pathway	biological_process	0.040952
GO:0002886	regulation of myeloid leukocyte mediated immunity	biological_process	0.040958
GO:0046879	hormone secretion	biological_process	0.041649
GO:0002520	immune system development	biological_process	0.041823
GO:0008344	adult locomotory behavior	biological_process	0.041972
GO:0032722	positive regulation of chemokine production	biological_process	0.04259
GO:0003823	antigen binding	molecular_function	0.042867
GO:0006816	calcium ion transport	biological_process	0.043765
GO:0048699	generation of neurons	biological_process	0.043765
GO:0001568	blood vessel development	biological_process	0.043765
GO:0051716	cellular response to stimulus	biological_process	0.043804
GO:0032561	guanyl ribonucleotide binding	molecular_function	0.044091
GO:0039530	MDA-5 signaling pathway	biological_process	0.044091
GO:0006909	phagocytosis	biological_process	0.044574
GO:0048878	chemical homeostasis	biological_process	0.044574
GO:0033218	amide binding	molecular_function	0.044574
GO:0060337	type I interferon-mediated signaling pathway	biological_process	0.044574
GO:0071357	cellular response to type I interferon	biological_process	0.044574
GO:0019001	guanyl nucleotide binding	molecular_function	0.04504
GO:0042175	nuclear outer membrane-endoplasmic reticulum membrane network	cellular_component	0.045054
GO:0034121	regulation of toll-like receptor signaling pathway	biological_process	0.045441
GO:0030425	dendrite	cellular_component	0.045441
GO:0001661	conditioned taste aversion	biological_process	0.045441
GO:0046596	regulation of viral entry into host cell	biological_process	0.046
GO:0007269	neurotransmitter secretion	biological_process	0.04652
GO:0051130	positive regulation of cellular component organization	biological_process	0.046678
GO:0019838	growth factor binding	molecular_function	0.046929
GO:0097060	synaptic membrane	cellular_component	0.046929
GO:0008015	blood circulation	biological_process	0.046929
GO:0046914	transition metal ion binding	molecular_function	0.046929
GO:0032606	type I interferon production	biological_process	0.047079
GO:0019725	cellular homeostasis	biological_process	0.047934
GO:0060047	heart contraction	biological_process	0.048627
GO:0055074	calcium ion homeostasis	biological_process	0.049342
GO:0050789	regulation of biological process	biological_process	0.049389
GO:0044342	type B pancreatic cell proliferation	biological_process	0.049389
GO:0016023	cytoplasmic membrane-bounded vesicle	cellular_component	0.049516
GO:0005789	endoplasmic reticulum membrane	cellular_component	0.049886
GO:0010817	regulation of hormone levels	biological_process	0.049886
GO:0070852	cell body fiber	cellular_component	0.049914
GO:0034612	response to tumor necrosis factor	biological_process	0.049934

## Sheet: GO (upregulated DEGs)
GO enrichment of the upregulated DEGs
GO_accession	Description	Term_type	Adjusted_pValue
GO:0006952	defense response	biological_process	1.0369e-38
GO:0002376	immune system process	biological_process	1.4095e-37
GO:0006955	immune response	biological_process	7.3004e-35
GO:0045087	innate immune response	biological_process	1.144e-33
GO:0034097	response to cytokine stimulus	biological_process	8.9141e-30
GO:0051707	response to other organism	biological_process	2.5172e-29
GO:0009607	response to biotic stimulus	biological_process	6.3396e-28
GO:0006950	response to stress	biological_process	1.5272e-24
GO:0051704	multi-organism process	biological_process	5.0232e-24
GO:0035456	response to interferon-beta	biological_process	4.1602e-22
GO:0002682	regulation of immune system process	biological_process	1.0491e-21
GO:0071345	cellular response to cytokine stimulus	biological_process	1.289e-21
GO:0002252	immune effector process	biological_process	4.3969e-20
GO:0070887	cellular response to chemical stimulus	biological_process	4.8209e-20
GO:0010033	response to organic substance	biological_process	3.875e-19
GO:0002684	positive regulation of immune system process	biological_process	3.6324e-18
GO:0071310	cellular response to organic substance	biological_process	6.1024e-18
GO:0035458	cellular response to interferon-beta	biological_process	1.2275e-17
GO:0050776	regulation of immune response	biological_process	1.6754e-17
GO:0009615	response to virus	biological_process	4.7111e-17
GO:0034341	response to interferon-gamma	biological_process	8.0643e-17
GO:0031347	regulation of defense response	biological_process	4.7782e-16
GO:0051607	defense response to virus	biological_process	3.8369e-15
GO:0048002	antigen processing and presentation of peptide antigen	biological_process	4.1847e-15
GO:0001817	regulation of cytokine production	biological_process	6.3022e-15
GO:0001816	cytokine production	biological_process	8.4685e-15
GO:0019882	antigen processing and presentation	biological_process	1.1937e-14
GO:0045088	regulation of innate immune response	biological_process	3.9992e-13
GO:0050778	positive regulation of immune response	biological_process	4.5917e-13
GO:0048584	positive regulation of response to stimulus	biological_process	3.232e-12
GO:0050896	response to stimulus	biological_process	4.0402e-12
GO:0009617	response to bacterium	biological_process	7.0757e-12
GO:0031349	positive regulation of defense response	biological_process	1.7195e-11
GO:0001819	positive regulation of cytokine production	biological_process	2.9893e-11
GO:0042611	MHC protein complex	cellular_component	3.1291e-11
GO:0045089	positive regulation of innate immune response	biological_process	5.6861e-11
GO:0051239	regulation of multicellular organismal process	biological_process	7.9553e-11
GO:0048518	positive regulation of biological process	biological_process	3.5985e-10
GO:0071346	cellular response to interferon-gamma	biological_process	9.2373e-10
GO:0002237	response to molecule of bacterial origin	biological_process	1.028e-09
GO:0080134	regulation of response to stress	biological_process	1.3662e-09
GO:0032496	response to lipopolysaccharide	biological_process	1.8071e-09
GO:0071219	cellular response to molecule of bacterial origin	biological_process	3.679e-09
GO:0048583	regulation of response to stimulus	biological_process	5.0436e-09
GO:0042832	defense response to protozoan	biological_process	1.31e-08
GO:0071222	cellular response to lipopolysaccharide	biological_process	1.4398e-08
GO:0042221	response to chemical stimulus	biological_process	1.4657e-08
GO:0002758	innate immune response-activating signal transduction	biological_process	1.8088e-08
GO:0002443	leukocyte mediated immunity	biological_process	1.8607e-08
GO:0009986	cell surface	cellular_component	2.2357e-08
GO:0071216	cellular response to biotic stimulus	biological_process	2.3306e-08
GO:0035455	response to interferon-alpha	biological_process	2.3497e-08
GO:0001562	response to protozoan	biological_process	3.3292e-08
GO:0044403	symbiosis, encompassing mutualism through parasitism	biological_process	3.419e-08
GO:0044419	interspecies interaction between organisms	biological_process	3.419e-08
GO:0002218	activation of innate immune response	biological_process	3.8077e-08
GO:0002253	activation of immune response	biological_process	5.1411e-08
GO:0002221	pattern recognition receptor signaling pathway	biological_process	5.9038e-08
GO:0002697	regulation of immune effector process	biological_process	6.4481e-08
GO:0002474	antigen processing and presentation of peptide antigen via MHC class I	biological_process	6.6398e-08
GO:0022610	biological adhesion	biological_process	6.7559e-08
GO:0033993	response to lipid	biological_process	9.6243e-08
GO:0045335	phagocytic vesicle	cellular_component	1.1898e-07
GO:0042605	peptide antigen binding	molecular_function	1.2419e-07
GO:0020005	symbiont-containing vacuole membrane	cellular_component	2.2894e-07
GO:0002764	immune response-regulating signaling pathway	biological_process	2.331e-07
GO:0006954	inflammatory response	biological_process	2.4876e-07
GO:0002821	positive regulation of adaptive immune response	biological_process	2.5805e-07
GO:0009611	response to wounding	biological_process	2.6773e-07
GO:0044459	plasma membrane part	cellular_component	3.0214e-07
GO:0051701	interaction with host	biological_process	4.3776e-07
GO:0002478	antigen processing and presentation of exogenous peptide antigen	biological_process	5.6628e-07
GO:0002819	regulation of adaptive immune response	biological_process	6.3532e-07
GO:0051240	positive regulation of multicellular organismal process	biological_process	6.7609e-07
GO:0042110	T cell activation	biological_process	8.8789e-07
GO:0050900	leukocyte migration	biological_process	8.8789e-07
GO:0002250	adaptive immune response	biological_process	1.1329e-06
GO:0051049	regulation of transport	biological_process	1.1489e-06
GO:0043900	regulation of multi-organism process	biological_process	1.1489e-06
GO:0001775	cell activation	biological_process	1.2404e-06
GO:0002824	positive regulation of adaptive immune response based on somatic recombination of immune receptors built from immunoglobulin superfamily domains	biological_process	1.2404e-06
GO:0043230	extracellular organelle	cellular_component	1.2878e-06
GO:0065010	extracellular membrane-bounded organelle	cellular_component	1.2878e-06
GO:0019221	cytokine-mediated signaling pathway	biological_process	1.3142e-06
GO:0020003	symbiont-containing vacuole	cellular_component	1.3142e-06
GO:0048522	positive regulation of cellular process	biological_process	1.35e-06
GO:0002683	negative regulation of immune system process	biological_process	1.4624e-06
GO:0030670	phagocytic vesicle membrane	cellular_component	1.7037e-06
GO:0032879	regulation of localization	biological_process	1.7194e-06
GO:0002705	positive regulation of leukocyte mediated immunity	biological_process	1.875e-06
GO:0001909	leukocyte mediated cytotoxicity	biological_process	1.9332e-06
GO:1901700	response to oxygen-containing compound	biological_process	2.1184e-06
GO:0005515	protein binding	molecular_function	2.7698e-06
GO:0002703	regulation of leukocyte mediated immunity	biological_process	2.7849e-06
GO:0051716	cellular response to stimulus	biological_process	3.1501e-06
GO:0045321	leukocyte activation	biological_process	3.349e-06
GO:0002449	lymphocyte mediated immunity	biological_process	3.3733e-06
GO:0002504	antigen processing and presentation of peptide or polysaccharide antigen via MHC class II	biological_process	4.1462e-06
GO:0050870	positive regulation of T cell activation	biological_process	4.239e-06
GO:0030595	leukocyte chemotaxis	biological_process	4.4235e-06
GO:0019884	antigen processing and presentation of exogenous antigen	biological_process	4.5176e-06
GO:0051050	positive regulation of transport	biological_process	5.2574e-06
GO:0071621	granulocyte chemotaxis	biological_process	6.2863e-06
GO:0042742	defense response to bacterium	biological_process	6.3677e-06
GO:0002699	positive regulation of immune effector process	biological_process	6.4951e-06
GO:0044406	adhesion to host	biological_process	9.5212e-06
GO:0051825	adhesion to other organism involved in symbiotic interaction	biological_process	9.5212e-06
GO:0031982	vesicle	cellular_component	1.0979e-05
GO:0030430	host cell cytoplasm	cellular_component	1.1183e-05
GO:0033655	host cell cytoplasm part	cellular_component	1.1183e-05
GO:0007155	cell adhesion	biological_process	1.1183e-05
GO:0043245	extraorganismal space	cellular_component	1.4262e-05
GO:0044215	other organism	cellular_component	1.4262e-05
GO:0044216	other organism cell	cellular_component	1.4262e-05
GO:0044217	other organism part	cellular_component	1.4262e-05
GO:0030666	endocytic vesicle membrane	cellular_component	1.4681e-05
GO:0070062	extracellular vesicular exosome	cellular_component	1.627e-05
GO:0050863	regulation of T cell activation	biological_process	1.777e-05
GO:0002495	antigen processing and presentation of peptide antigen via MHC class II	biological_process	1.8346e-05
GO:0045071	negative regulation of viral genome replication	biological_process	1.9983e-05
GO:0002224	toll-like receptor signaling pathway	biological_process	2.0686e-05
GO:0002757	immune response-activating signal transduction	biological_process	2.2296e-05
GO:0002460	adaptive immune response based on somatic recombination of immune receptors built from immunoglobulin superfamily domains	biological_process	2.3721e-05
GO:0030139	endocytic vesicle	cellular_component	2.48e-05
GO:0016032	viral process	biological_process	2.6514e-05
GO:0031988	membrane-bounded vesicle	cellular_component	2.6704e-05
GO:0044764	multi-organism cellular process	biological_process	2.9651e-05
GO:0002274	myeloid leukocyte activation	biological_process	3.0671e-05
GO:0033646	host intracellular part	cellular_component	3.1206e-05
GO:0043656	intracellular region of host	cellular_component	3.1206e-05
GO:0042129	regulation of T cell proliferation	biological_process	3.1225e-05
GO:0044699	single-organism process	biological_process	3.1252e-05
GO:0002483	antigen processing and presentation of endogenous peptide antigen	biological_process	3.3604e-05
GO:0001910	regulation of leukocyte mediated cytotoxicity	biological_process	3.3667e-05
GO:0050715	positive regulation of cytokine secretion	biological_process	3.4204e-05
GO:0003725	double-stranded RNA binding	molecular_function	3.4939e-05
GO:0071396	cellular response to lipid	biological_process	3.9263e-05
GO:0060326	cell chemotaxis	biological_process	4.2089e-05
GO:0005576	extracellular region	cellular_component	4.2263e-05
GO:0030593	neutrophil chemotaxis	biological_process	4.3564e-05
GO:0009605	response to external stimulus	biological_process	4.5704e-05
GO:0001906	cell killing	biological_process	4.7667e-05
GO:0002822	regulation of adaptive immune response based on somatic recombination of immune receptors built from immunoglobulin superfamily domains	biological_process	4.7986e-05
GO:0048525	negative regulation of viral process	biological_process	4.92e-05
GO:0042098	T cell proliferation	biological_process	4.9242e-05
GO:0019883	antigen processing and presentation of endogenous antigen	biological_process	5.0679e-05
GO:0032675	regulation of interleukin-6 production	biological_process	5.2706e-05
GO:0050792	regulation of viral process	biological_process	5.2769e-05
GO:0018995	host	cellular_component	5.3897e-05
GO:0033643	host cell part	cellular_component	5.3897e-05
GO:0043657	host cell	cellular_component	5.3897e-05
GO:0001730	2'-5'-oligoadenylate synthetase activity	molecular_function	6.7606e-05
GO:0042613	MHC class II protein complex	cellular_component	6.9504e-05
GO:0046977	TAP binding	molecular_function	6.9504e-05
GO:0016477	cell migration	biological_process	6.9504e-05
GO:0044421	extracellular region part	cellular_component	6.9504e-05
GO:0032635	interleukin-6 production	biological_process	7.7268e-05
GO:0060760	positive regulation of response to cytokine stimulus	biological_process	7.8364e-05
GO:0042119	neutrophil activation	biological_process	7.8376e-05
GO:0002708	positive regulation of lymphocyte mediated immunity	biological_process	8.8976e-05
GO:0030097	hemopoiesis	biological_process	9.2514e-05
GO:0043903	regulation of symbiosis, encompassing mutualism through parasitism	biological_process	9.7669e-05
GO:0002687	positive regulation of leukocyte migration	biological_process	0.00011358
GO:0042127	regulation of cell proliferation	biological_process	0.00011392
GO:0048534	hematopoietic or lymphoid organ development	biological_process	0.00011392
GO:0050670	regulation of lymphocyte proliferation	biological_process	0.00011392
GO:0042612	MHC class I protein complex	cellular_component	0.00011392
GO:0008283	cell proliferation	biological_process	0.00011438
GO:0030881	beta-2-microglobulin binding	molecular_function	0.00011522
GO:0003924	GTPase activity	molecular_function	0.00011522
GO:0032944	regulation of mononuclear cell proliferation	biological_process	0.00011912
GO:0005488	binding	molecular_function	0.00012009
GO:0032403	protein complex binding	molecular_function	0.00012372
GO:0031341	regulation of cell killing	biological_process	0.00012763
GO:0007229	integrin-mediated signaling pathway	biological_process	0.00013455
GO:0050707	regulation of cytokine secretion	biological_process	0.00014148
GO:0002888	positive regulation of myeloid leukocyte mediated immunity	biological_process	0.00015082
GO:0040017	positive regulation of locomotion	biological_process	0.00015917
GO:0032680	regulation of tumor necrosis factor production	biological_process	0.00017044
GO:0044763	single-organism cellular process	biological_process	0.00017705
GO:0001912	positive regulation of leukocyte mediated cytotoxicity	biological_process	0.00018744
GO:0032640	tumor necrosis factor production	biological_process	0.00019411
GO:0050714	positive regulation of protein secretion	biological_process	0.00019411
GO:0070663	regulation of leukocyte proliferation	biological_process	0.00020453
GO:0043901	negative regulation of multi-organism process	biological_process	0.00022401
GO:0071706	tumor necrosis factor superfamily cytokine production	biological_process	0.00023446
GO:0048870	cell motility	biological_process	0.0002443
GO:0051674	localization of cell	biological_process	0.0002443
GO:0042608	T cell receptor binding	molecular_function	0.00024886
GO:0051222	positive regulation of protein transport	biological_process	0.0002548
GO:0040011	locomotion	biological_process	0.00026158
GO:0002520	immune system development	biological_process	0.00028937
GO:0051046	regulation of secretion	biological_process	0.00030536
GO:0002685	regulation of leukocyte migration	biological_process	0.00031013
GO:0050830	defense response to Gram-positive bacterium	biological_process	0.00031468
GO:0036230	granulocyte activation	biological_process	0.00038032
GO:0014070	response to organic cyclic compound	biological_process	0.00038319
GO:0046651	lymphocyte proliferation	biological_process	0.000417
GO:0032943	mononuclear cell proliferation	biological_process	0.00043603
GO:0051094	positive regulation of developmental process	biological_process	0.00043603
GO:0032103	positive regulation of response to external stimulus	biological_process	0.00045262
GO:0048513	organ development	biological_process	0.00045262
GO:0050708	regulation of protein secretion	biological_process	0.00048349
GO:0050865	regulation of cell activation	biological_process	0.00049024
GO:0050663	cytokine secretion	biological_process	0.00050662
GO:0046903	secretion	biological_process	0.00052225
GO:0001794	type IIa hypersensitivity	biological_process	0.00054392
GO:0001796	regulation of type IIa hypersensitivity	biological_process	0.00054392
GO:0001798	positive regulation of type IIa hypersensitivity	biological_process	0.00054392
GO:0002445	type II hypersensitivity	biological_process	0.00054392
GO:0002892	regulation of type II hypersensitivity	biological_process	0.00054392
GO:0002894	positive regulation of type II hypersensitivity	biological_process	0.00054392
GO:0045069	regulation of viral genome replication	biological_process	0.00054532
GO:0002456	T cell mediated immunity	biological_process	0.00055808
GO:0002521	leukocyte differentiation	biological_process	0.00065662
GO:0008219	cell death	biological_process	0.00067863
GO:0016265	death	biological_process	0.00067863
GO:1901701	cellular response to oxygen-containing compound	biological_process	0.00070059
GO:2000147	positive regulation of cell motility	biological_process	0.00074513
GO:0051223	regulation of protein transport	biological_process	0.0007588
GO:0070661	leukocyte proliferation	biological_process	0.00077457
GO:0002706	regulation of lymphocyte mediated immunity	biological_process	0.00079839
GO:0032647	regulation of interferon-alpha production	biological_process	0.00079839
GO:0051272	positive regulation of cellular component movement	biological_process	0.00087519
GO:0032606	type I interferon production	biological_process	0.00087519
GO:0050867	positive regulation of cell activation	biological_process	0.00087539
GO:0019865	immunoglobulin binding	molecular_function	0.00087919
GO:0042277	peptide binding	molecular_function	0.00088777
GO:0060341	regulation of cellular localization	biological_process	0.00089146
GO:0031663	lipopolysaccharide-mediated signaling pathway	biological_process	0.00089998
GO:0031343	positive regulation of cell killing	biological_process	0.00090356
GO:0032101	regulation of response to external stimulus	biological_process	0.00090356
GO:0019079	viral genome replication	biological_process	0.00091269
GO:0032607	interferon-alpha production	biological_process	0.00099653
GO:0019886	antigen processing and presentation of exogenous peptide antigen via MHC class II	biological_process	0.0010213
GO:0001913	T cell mediated cytotoxicity	biological_process	0.0011046
GO:0045597	positive regulation of cell differentiation	biological_process	0.0011701
GO:0009967	positive regulation of signal transduction	biological_process	0.0011927
GO:0051179	localization	biological_process	0.0012258
GO:0046649	lymphocyte activation	biological_process	0.0012549
GO:0006909	phagocytosis	biological_process	0.0012911
GO:0030335	positive regulation of cell migration	biological_process	0.0012911
GO:0009306	protein secretion	biological_process	0.0013049
GO:0005525	GTP binding	molecular_function	0.001339
GO:0002694	regulation of leukocyte activation	biological_process	0.0014319
GO:0033218	amide binding	molecular_function	0.0014385
GO:0009897	external side of plasma membrane	cellular_component	0.0014555
GO:0034340	response to type I interferon	biological_process	0.0014555
GO:0038094	Fc-gamma receptor signaling pathway	biological_process	0.0014558
GO:0012501	programmed cell death	biological_process	0.0014619
GO:0034121	regulation of toll-like receptor signaling pathway	biological_process	0.0014619
GO:0032760	positive regulation of tumor necrosis factor production	biological_process	0.0014803
GO:0006935	chemotaxis	biological_process	0.0014843
GO:0051270	regulation of cellular component movement	biological_process	0.0015712
GO:0042330	taxis	biological_process	0.0015826
GO:0045637	regulation of myeloid cell differentiation	biological_process	0.0015834
GO:0001047	core promoter binding	molecular_function	0.0016932
GO:0050727	regulation of inflammatory response	biological_process	0.0017712
GO:0042102	positive regulation of T cell proliferation	biological_process	0.0017712
GO:0035457	cellular response to interferon-alpha	biological_process	0.0017832
GO:0001914	regulation of T cell mediated cytotoxicity	biological_process	0.0018493
GO:0006928	cellular component movement	biological_process	0.0018506
GO:0031960	response to corticosteroid stimulus	biological_process	0.001865
GO:0002886	regulation of myeloid leukocyte mediated immunity	biological_process	0.0018708
GO:0042116	macrophage activation	biological_process	0.001871
GO:0040012	regulation of locomotion	biological_process	0.001871
GO:0042590	antigen processing and presentation of exogenous peptide antigen via MHC class I	biological_process	0.0018741
GO:0032561	guanyl ribonucleotide binding	molecular_function	0.0019781
GO:0019001	guanyl nucleotide binding	molecular_function	0.0020295
GO:0002283	neutrophil activation involved in immune response	biological_process	0.0020295
GO:0071944	cell periphery	cellular_component	0.002128
GO:0005783	endoplasmic reticulum	cellular_component	0.0021435
GO:0072678	T cell migration	biological_process	0.0022305
GO:0070201	regulation of establishment of protein localization	biological_process	0.0022983
GO:0045123	cellular extravasation	biological_process	0.0024821
GO:0006810	transport	biological_process	0.0025009
GO:0048519	negative regulation of biological process	biological_process	0.0027238
GO:0032020	ISG15-protein conjugation	biological_process	0.0027429
GO:0016337	cell-cell adhesion	biological_process	0.0029786
GO:0043168	anion binding	molecular_function	0.0030008
GO:0050671	positive regulation of lymphocyte proliferation	biological_process	0.0032572
GO:2000026	regulation of multicellular organismal development	biological_process	0.0032615
GO:0007159	leukocyte cell-cell adhesion	biological_process	0.0033976
GO:0045639	positive regulation of myeloid cell differentiation	biological_process	0.0034499
GO:0032946	positive regulation of mononuclear cell proliferation	biological_process	0.003455
GO:0006915	apoptotic process	biological_process	0.0034987
GO:0032722	positive regulation of chemokine production	biological_process	0.0037205
GO:0045351	type I interferon biosynthetic process	biological_process	0.0037571
GO:0002579	positive regulation of antigen processing and presentation	biological_process	0.0040003
GO:0046718	viral entry into host cell	biological_process	0.0040986
GO:0005797	Golgi medial cisterna	cellular_component	0.0041051
GO:0051384	response to glucocorticoid stimulus	biological_process	0.0041167
GO:0050766	positive regulation of phagocytosis	biological_process	0.004148
GO:0023056	positive regulation of signaling	biological_process	0.004148
GO:0001961	positive regulation of cytokine-mediated signaling pathway	biological_process	0.0042552
GO:0051047	positive regulation of secretion	biological_process	0.004278
GO:0010647	positive regulation of cell communication	biological_process	0.0044232
GO:0032479	regulation of type I interferon production	biological_process	0.0045851
GO:0032880	regulation of protein localization	biological_process	0.0047412
GO:0070665	positive regulation of leukocyte proliferation	biological_process	0.0048459
GO:0005886	plasma membrane	cellular_component	0.0048459
GO:0042089	cytokine biosynthetic process	biological_process	0.0050265
GO:0046596	regulation of viral entry into host cell	biological_process	0.0051719
GO:0030260	entry into host cell	biological_process	0.005198
GO:0044409	entry into host	biological_process	0.005198
GO:0051806	entry into cell of other organism involved in symbiotic interaction	biological_process	0.005198
GO:0051828	entry into other organism involved in symbiotic interaction	biological_process	0.005198
GO:0052126	movement in host environment	biological_process	0.005198
GO:0052192	movement in environment of other organism involved in symbiotic interaction	biological_process	0.005198
GO:0050793	regulation of developmental process	biological_process	0.0052044
GO:0008305	integrin complex	cellular_component	0.0052064
GO:0032940	secretion by cell	biological_process	0.0052841
GO:0002696	positive regulation of leukocyte activation	biological_process	0.0053848
GO:0051924	regulation of calcium ion transport	biological_process	0.0054804
GO:0030334	regulation of cell migration	biological_process	0.0059881
GO:2000145	regulation of cell motility	biological_process	0.0060128
GO:0050764	regulation of phagocytosis	biological_process	0.0060128
GO:0002831	regulation of response to biotic stimulus	biological_process	0.0060152
GO:0030217	T cell differentiation	biological_process	0.0060224
GO:0060337	type I interferon-mediated signaling pathway	biological_process	0.0060233
GO:0071357	cellular response to type I interferon	biological_process	0.0060233
GO:0032649	regulation of interferon-gamma production	biological_process	0.0060233
GO:1902107	positive regulation of leukocyte differentiation	biological_process	0.0063965
GO:0060759	regulation of response to cytokine stimulus	biological_process	0.0063965
GO:0001818	negative regulation of cytokine production	biological_process	0.0063965
GO:0042107	cytokine metabolic process	biological_process	0.0063965
GO:0031226	intrinsic to plasma membrane	cellular_component	0.0064704
GO:0051234	establishment of localization	biological_process	0.0064795
GO:0048545	response to steroid hormone stimulus	biological_process	0.0069424
GO:0042802	identical protein binding	molecular_function	0.0069823
GO:0019763	immunoglobulin receptor activity	molecular_function	0.0070156
GO:0039530	MDA-5 signaling pathway	biological_process	0.0071068
GO:0002690	positive regulation of leukocyte chemotaxis	biological_process	0.007169
GO:0034163	regulation of toll-like receptor 9 signaling pathway	biological_process	0.007169
GO:0019863	IgE binding	molecular_function	0.0072479
GO:0019864	IgG binding	molecular_function	0.0072906
GO:0010959	regulation of metal ion transport	biological_process	0.0077299
GO:0032642	regulation of chemokine production	biological_process	0.0077354
GO:0006897	endocytosis	biological_process	0.007876
GO:0001916	positive regulation of T cell mediated cytotoxicity	biological_process	0.0079237
GO:0071622	regulation of granulocyte chemotaxis	biological_process	0.0079825
GO:0002444	myeloid leukocyte mediated immunity	biological_process	0.0094817
GO:0002753	cytoplasmic pattern recognition receptor signaling pathway	biological_process	0.0096057
GO:0030099	myeloid cell differentiation	biological_process	0.0097491
GO:0044425	membrane part	cellular_component	0.010242
GO:0002885	positive regulation of hypersensitivity	biological_process	0.010354
GO:0010038	response to metal ion	biological_process	0.010526
GO:0019885	antigen processing and presentation of endogenous peptide antigen via MHC class I	biological_process	0.01054
GO:0032609	interferon-gamma production	biological_process	0.01079
GO:0032570	response to progesterone stimulus	biological_process	0.0108
GO:0044765	single-organism transport	biological_process	0.0108
GO:0060333	interferon-gamma-mediated signaling pathway	biological_process	0.010953
GO:0072676	lymphocyte migration	biological_process	0.011199
GO:0048731	system development	biological_process	0.011322
GO:0001891	phagocytic cup	cellular_component	0.011426
GO:0032602	chemokine production	biological_process	0.011502
GO:0003823	antigen binding	molecular_function	0.012129
GO:0016327	apicolateral plasma membrane	cellular_component	0.012227
GO:0003727	single-stranded RNA binding	molecular_function	0.012318
GO:0002709	regulation of T cell mediated immunity	biological_process	0.012582
GO:0005789	endoplasmic reticulum membrane	cellular_component	0.013076
GO:0050729	positive regulation of inflammatory response	biological_process	0.01338
GO:0070971	endoplasmic reticulum exit site	cellular_component	0.01338
GO:0060627	regulation of vesicle-mediated transport	biological_process	0.01338
GO:0002711	positive regulation of T cell mediated immunity	biological_process	0.013974
GO:0043235	receptor complex	cellular_component	0.014087
GO:0002755	MyD88-dependent toll-like receptor signaling pathway	biological_process	0.014129
GO:0071277	cellular response to calcium ion	biological_process	0.014161
GO:1902105	regulation of leukocyte differentiation	biological_process	0.01509
GO:0009628	response to abiotic stimulus	biological_process	0.015242
GO:0097285	cell-type specific apoptotic process	biological_process	0.0156
GO:0045582	positive regulation of T cell differentiation	biological_process	0.016288
GO:0010941	regulation of cell death	biological_process	0.016288
GO:0007165	signal transduction	biological_process	0.016435
GO:0002577	regulation of antigen processing and presentation	biological_process	0.01674
GO:0039528	cytoplasmic pattern recognition receptor signaling pathway in response to virus	biological_process	0.016776
GO:0017111	nucleoside-triphosphatase activity	molecular_function	0.016787
GO:2000425	regulation of apoptotic cell clearance	biological_process	0.017229
GO:0042175	nuclear outer membrane-endoplasmic reticulum membrane network	cellular_component	0.017411
GO:0001046	core promoter sequence-specific DNA binding	molecular_function	0.017541
GO:0033627	cell adhesion mediated by integrin	biological_process	0.017856
GO:0032481	positive regulation of type I interferon production	biological_process	0.017856
GO:0016020	membrane	cellular_component	0.017856
GO:0032398	MHC class Ib protein complex	cellular_component	0.017856
GO:0071407	cellular response to organic cyclic compound	biological_process	0.018789
GO:0032727	positive regulation of interferon-alpha production	biological_process	0.019021
GO:0046598	positive regulation of viral entry into host cell	biological_process	0.019125
GO:0033630	positive regulation of cell adhesion mediated by integrin	biological_process	0.019403
GO:0008009	chemokine activity	molecular_function	0.019549
GO:0043269	regulation of ion transport	biological_process	0.019759
GO:0043299	leukocyte degranulation	biological_process	0.019978
GO:0009966	regulation of signal transduction	biological_process	0.019978
GO:0070566	adenylyltransferase activity	molecular_function	0.020023
GO:0044432	endoplasmic reticulum part	cellular_component	0.02031
GO:0038093	Fc receptor signaling pathway	biological_process	0.02031
GO:0050250	retinal oxidase activity	molecular_function	0.020464
GO:0032677	regulation of interleukin-8 production	biological_process	0.020464
GO:0044767	single-organism developmental process	biological_process	0.020464
GO:0051251	positive regulation of lymphocyte activation	biological_process	0.020464
GO:0002883	regulation of hypersensitivity	biological_process	0.020464
GO:0035914	skeletal muscle cell differentiation	biological_process	0.020464
GO:0002866	positive regulation of acute inflammatory response to antigenic stimulus	biological_process	0.020605
GO:0043227	membrane-bounded organelle	cellular_component	0.020711
GO:0000979	RNA polymerase II core promoter sequence-specific DNA binding	molecular_function	0.02116
GO:0070391	response to lipoteichoic acid	biological_process	0.021272
GO:0071223	cellular response to lipoteichoic acid	biological_process	0.021272
GO:0045807	positive regulation of endocytosis	biological_process	0.021323
GO:0031348	negative regulation of defense response	biological_process	0.021841
GO:0043066	negative regulation of apoptotic process	biological_process	0.021841
GO:0045104	intermediate filament cytoskeleton organization	biological_process	0.022037
GO:0050789	regulation of biological process	biological_process	0.022138
GO:0002688	regulation of leukocyte chemotaxis	biological_process	0.022138
GO:0001530	lipopolysaccharide binding	molecular_function	0.022337
GO:0048872	homeostasis of number of cells	biological_process	0.022367
GO:0002366	leukocyte activation involved in immune response	biological_process	0.022588
GO:0042981	regulation of apoptotic process	biological_process	0.0228
GO:2000482	regulation of interleukin-8 secretion	biological_process	0.022951
GO:0071248	cellular response to metal ion	biological_process	0.023023
GO:0034612	response to tumor necrosis factor	biological_process	0.02351
GO:0002695	negative regulation of leukocyte activation	biological_process	0.023698
GO:0002262	myeloid cell homeostasis	biological_process	0.023874
GO:0002548	monocyte chemotaxis	biological_process	0.023927
GO:0045444	fat cell differentiation	biological_process	0.024018
GO:0045103	intermediate filament-based process	biological_process	0.024085
GO:0000323	lytic vacuole	cellular_component	0.024085
GO:0005764	lysosome	cellular_component	0.024085
GO:0031225	anchored to membrane	cellular_component	0.024547
GO:0002675	positive regulation of acute inflammatory response	biological_process	0.024547
GO:0051592	response to calcium ion	biological_process	0.024547
GO:0002263	cell activation involved in immune response	biological_process	0.024709
GO:0043067	regulation of programmed cell death	biological_process	0.025942
GO:0043069	negative regulation of programmed cell death	biological_process	0.025942
GO:1900245	positive regulation of MDA-5 signaling pathway	biological_process	0.02605
GO:0033628	regulation of cell adhesion mediated by integrin	biological_process	0.02605
GO:0009893	positive regulation of metabolic process	biological_process	0.028591
GO:0042287	MHC protein binding	molecular_function	0.028591
GO:0032637	interleukin-8 production	biological_process	0.028668
GO:0002698	negative regulation of immune effector process	biological_process	0.029249
GO:0032648	regulation of interferon-beta production	biological_process	0.029837
GO:0060340	positive regulation of type I interferon-mediated signaling pathway	biological_process	0.029837
GO:0050688	regulation of defense response to virus	biological_process	0.029837
GO:0005887	integral to plasma membrane	cellular_component	0.031132
GO:0010035	response to inorganic substance	biological_process	0.031295
GO:0050868	negative regulation of T cell activation	biological_process	0.031401
GO:0034162	toll-like receptor 9 signaling pathway	biological_process	0.031494
GO:0051249	regulation of lymphocyte activation	biological_process	0.031519
GO:0016462	pyrophosphatase activity	molecular_function	0.031524
GO:0045595	regulation of cell differentiation	biological_process	0.031524
GO:0043226	organelle	cellular_component	0.031701
GO:0045621	positive regulation of lymphocyte differentiation	biological_process	0.032318
GO:0008284	positive regulation of cell proliferation	biological_process	0.032478
GO:0050866	negative regulation of cell activation	biological_process	0.032622
GO:0097110	scaffold protein binding	molecular_function	0.032622
GO:0032608	interferon-beta production	biological_process	0.032654
GO:0016818	hydrolase activity, acting on acid anhydrides, in phosphorus-containing anhydrides	molecular_function	0.032717
GO:0002524	hypersensitivity	biological_process	0.033291
GO:0048245	eosinophil chemotaxis	biological_process	0.033545
GO:0051247	positive regulation of protein metabolic process	biological_process	0.033608
GO:0016817	hydrolase activity, acting on acid anhydrides	molecular_function	0.033715
GO:0034113	heterotypic cell-cell adhesion	biological_process	0.033826
GO:0002573	myeloid leukocyte differentiation	biological_process	0.033835
GO:0002438	acute inflammatory response to antigenic stimulus	biological_process	0.034484
GO:0005911	cell-cell junction	cellular_component	0.034591
GO:0004854	xanthine dehydrogenase activity	molecular_function	0.034655
GO:0009115	xanthine catabolic process	biological_process	0.034655
GO:0016726	oxidoreductase activity, acting on CH or CH2 groups, NAD or NADP as acceptor	molecular_function	0.034655
GO:0042379	chemokine receptor binding	molecular_function	0.034944
GO:0001802	type III hypersensitivity	biological_process	0.034973
GO:0001803	regulation of type III hypersensitivity	biological_process	0.034973
GO:0001805	positive regulation of type III hypersensitivity	biological_process	0.034973
GO:0005044	scavenger receptor activity	molecular_function	0.035058
GO:0071675	regulation of mononuclear cell migration	biological_process	0.035916
GO:0071556	integral to lumenal side of endoplasmic reticulum membrane	cellular_component	0.036032
GO:0060548	negative regulation of cell death	biological_process	0.036543
GO:0023051	regulation of signaling	biological_process	0.036744
GO:0065007	biological regulation	biological_process	0.036744
GO:0072606	interleukin-8 secretion	biological_process	0.038366
GO:0002693	positive regulation of cellular extravasation	biological_process	0.038366
GO:0030154	cell differentiation	biological_process	0.038609
GO:0016192	vesicle-mediated transport	biological_process	0.038636
GO:0009719	response to endogenous stimulus	biological_process	0.039111
GO:0010646	regulation of cell communication	biological_process	0.039333
GO:0060099	regulation of phagocytosis, engulfment	biological_process	0.039352
GO:0032755	positive regulation of interleukin-6 production	biological_process	0.040076
GO:0031325	positive regulation of cellular metabolic process	biological_process	0.040279
GO:0019058	viral infectious cycle	biological_process	0.040681
GO:0003690	double-stranded DNA binding	molecular_function	0.041094
GO:0019770	IgG receptor activity	molecular_function	0.041094
GO:0002484	antigen processing and presentation of endogenous peptide antigen via MHC class I via ER pathway	biological_process	0.041094
GO:0002485	antigen processing and presentation of endogenous peptide antigen via MHC class I via ER pathway, TAP-dependent	biological_process	0.041094
GO:0002476	antigen processing and presentation of endogenous peptide antigen via MHC class Ib	biological_process	0.041094
GO:0019767	IgE receptor activity	molecular_function	0.041094
GO:0071725	response to triacyl bacterial lipopeptide	biological_process	0.041094
GO:0071727	cellular response to triacyl bacterial lipopeptide	biological_process	0.041094
GO:0001776	leukocyte homeostasis	biological_process	0.041094
GO:0035556	intracellular signal transduction	biological_process	0.0424
GO:0050921	positive regulation of chemotaxis	biological_process	0.04271
GO:0042035	regulation of cytokine biosynthetic process	biological_process	0.042765
GO:0045055	regulated secretory pathway	biological_process	0.042799
GO:0071702	organic substance transport	biological_process	0.043209
GO:0019955	cytokine binding	molecular_function	0.04347
GO:0042267	natural killer cell mediated cytotoxicity	biological_process	0.043667
GO:1901214	regulation of neuron death	biological_process	0.044216
GO:0034142	toll-like receptor 4 signaling pathway	biological_process	0.044313
GO:0071674	mononuclear cell migration	biological_process	0.044313
GO:0048856	anatomical structure development	biological_process	0.044313
GO:0031589	cell-substrate adhesion	biological_process	0.044861
GO:0070374	positive regulation of ERK1 and ERK2 cascade	biological_process	0.044902
GO:0005102	receptor binding	molecular_function	0.045139
GO:0030100	regulation of endocytosis	biological_process	0.045139
GO:0002714	positive regulation of B cell mediated immunity	biological_process	0.045139
GO:0002891	positive regulation of immunoglobulin mediated immune response	biological_process	0.045139
GO:0044700	single organism signaling	biological_process	0.046844
GO:0070212	protein poly-ADP-ribosylation	biological_process	0.047217
GO:0038066	p38MAPK cascade	biological_process	0.047268
GO:0016787	hydrolase activity	molecular_function	0.047268
GO:0023052	signaling	biological_process	0.047538
GO:0031224	intrinsic to membrane	cellular_component	0.048098
GO:0048585	negative regulation of response to stimulus	biological_process	0.048385
GO:0032386	regulation of intracellular transport	biological_process	0.049115
GO:0007154	cell communication	biological_process	0.049521

## Sheet: GO (downrgulated DEGs)
GO enrichment of the downregulated DEGs
GO_accession	Description	Term_type	Adjusted_pValue
GO:0045202	synapse	cellular_component	5.0482e-13
GO:0035637	multicellular organismal signaling	biological_process	3.5651e-12
GO:0019226	transmission of nerve impulse	biological_process	1.2683e-11
GO:0044456	synapse part	cellular_component	7.9547e-11
GO:0007267	cell-cell signaling	biological_process	7.9547e-11
GO:0007399	nervous system development	biological_process	1.133e-08
GO:0030424	axon	cellular_component	1.6977e-08
GO:0033267	axon part	cellular_component	1.6977e-08
GO:0042391	regulation of membrane potential	biological_process	1.7572e-08
GO:0007268	synaptic transmission	biological_process	3.1285e-08
GO:0097458	neuron part	cellular_component	4.7932e-08
GO:0050877	neurological system process	biological_process	5.0484e-08
GO:0044463	cell projection part	cellular_component	5.9876e-07
GO:0015267	channel activity	molecular_function	1.3927e-06
GO:0022803	passive transmembrane transporter activity	molecular_function	1.3927e-06
GO:0003008	system process	biological_process	1.6528e-06
GO:0044304	main axon	cellular_component	2.6867e-06
GO:0043005	neuron projection	cellular_component	3.4081e-06
GO:0005216	ion channel activity	molecular_function	5.5889e-06
GO:0022838	substrate-specific channel activity	molecular_function	7.0208e-06
GO:0022008	neurogenesis	biological_process	9.4829e-06
GO:0048699	generation of neurons	biological_process	2.8104e-05
GO:0048731	system development	biological_process	2.8104e-05
GO:0050905	neuromuscular process	biological_process	2.9017e-05
GO:0030054	cell junction	cellular_component	4.537e-05
GO:0048468	cell development	biological_process	4.537e-05
GO:0008076	voltage-gated potassium channel complex	cellular_component	5.5677e-05
GO:0022836	gated channel activity	molecular_function	6.3474e-05
GO:0022839	ion gated channel activity	molecular_function	6.3474e-05
GO:0006811	ion transport	biological_process	6.4171e-05
GO:0034705	potassium channel complex	cellular_component	7.3515e-05
GO:0015079	potassium ion transmembrane transporter activity	molecular_function	7.3515e-05
GO:0005201	extracellular matrix structural constituent	molecular_function	7.4518e-05
GO:0008021	synaptic vesicle	cellular_component	0.00011088
GO:0005267	potassium channel activity	molecular_function	0.0001131
GO:0065008	regulation of biological quality	biological_process	0.0001308
GO:0005261	cation channel activity	molecular_function	0.00013537
GO:0043269	regulation of ion transport	biological_process	0.00013537
GO:0034702	ion channel complex	cellular_component	0.00014423
GO:0005198	structural molecule activity	molecular_function	0.00014423
GO:0042995	cell projection	cellular_component	0.00014423
GO:0034220	ion transmembrane transport	biological_process	0.00014423
GO:0034703	cation channel complex	cellular_component	0.00015229
GO:0015672	monovalent inorganic cation transport	biological_process	0.00016177
GO:0007275	multicellular organismal development	biological_process	0.00019685
GO:0044707	single-multicellular organism process	biological_process	0.00019997
GO:0071804	cellular potassium ion transport	biological_process	0.00020771
GO:0071805	potassium ion transmembrane transport	biological_process	0.00020771
GO:0005615	extracellular space	cellular_component	0.00023985
GO:0044765	single-organism transport	biological_process	0.00025709
GO:0006812	cation transport	biological_process	0.0002695
GO:0006813	potassium ion transport	biological_process	0.00027967
GO:0015077	monovalent inorganic cation transmembrane transporter activity	molecular_function	0.00027967
GO:0022843	voltage-gated cation channel activity	molecular_function	0.00033813
GO:0014069	postsynaptic density	cellular_component	0.00036982
GO:0009612	response to mechanical stimulus	biological_process	0.00042542
GO:0032879	regulation of localization	biological_process	0.00047679
GO:0030001	metal ion transport	biological_process	0.00048011
GO:0031175	neuron projection development	biological_process	0.00048011
GO:0005578	proteinaceous extracellular matrix	cellular_component	0.00049275
GO:0051960	regulation of nervous system development	biological_process	0.00051016
GO:0097479	synaptic vesicle localization	biological_process	0.00058228
GO:0046873	metal ion transmembrane transporter activity	molecular_function	0.00059231
GO:0001505	regulation of neurotransmitter levels	biological_process	0.00064097
GO:0005249	voltage-gated potassium channel activity	molecular_function	0.00071223
GO:0032501	multicellular organismal process	biological_process	0.00074829
GO:0048666	neuron development	biological_process	0.00076001
GO:0005244	voltage-gated ion channel activity	molecular_function	0.00077219
GO:0022832	voltage-gated channel activity	molecular_function	0.00077219
GO:0051179	localization	biological_process	0.00083064
GO:0019894	kinesin binding	molecular_function	0.00083064
GO:0051049	regulation of transport	biological_process	0.00085297
GO:0048856	anatomical structure development	biological_process	0.00091342
GO:0030199	collagen fibril organization	biological_process	0.00091342
GO:0006810	transport	biological_process	0.00096658
GO:0031226	intrinsic to plasma membrane	cellular_component	0.0011895
GO:0022890	inorganic cation transmembrane transporter activity	molecular_function	0.0012179
GO:0031224	intrinsic to membrane	cellular_component	0.0012179
GO:0055085	transmembrane transport	biological_process	0.0013863
GO:0022891	substrate-specific transmembrane transporter activity	molecular_function	0.0013886
GO:0030136	clathrin-coated vesicle	cellular_component	0.0014304
GO:0005215	transporter activity	molecular_function	0.0016751
GO:0051234	establishment of localization	biological_process	0.0016751
GO:0051648	vesicle localization	biological_process	0.0016751
GO:0005887	integral to plasma membrane	cellular_component	0.0016751
GO:0031012	extracellular matrix	cellular_component	0.0016751
GO:0022857	transmembrane transporter activity	molecular_function	0.001732
GO:2000026	regulation of multicellular organismal development	biological_process	0.0018797
GO:0050767	regulation of neurogenesis	biological_process	0.0020211
GO:0006836	neurotransmitter transport	biological_process	0.0020211
GO:0043209	myelin sheath	cellular_component	0.0020562
GO:0034765	regulation of ion transmembrane transport	biological_process	0.0021033
GO:0060052	neurofilament cytoskeleton organization	biological_process	0.0021033
GO:0051899	membrane depolarization	biological_process	0.0021335
GO:0005886	plasma membrane	cellular_component	0.0021335
GO:0044699	single-organism process	biological_process	0.0022647
GO:0015075	ion transmembrane transporter activity	molecular_function	0.0022725
GO:0007417	central nervous system development	biological_process	0.0022842
GO:0007610	behavior	biological_process	0.0029774
GO:0022892	substrate-specific transporter activity	molecular_function	0.0029774
GO:0034762	regulation of transmembrane transport	biological_process	0.0029879
GO:0061564	axon development	biological_process	0.0031353
GO:0016021	integral to membrane	cellular_component	0.0034012
GO:0005509	calcium ion binding	molecular_function	0.003965
GO:0071944	cell periphery	cellular_component	0.00433
GO:0000904	cell morphogenesis involved in differentiation	biological_process	0.0049572

## Sheet: KEGG analysis of total DEGs
KEGG enrichment of the total DEGs
ID	Term	Adjusted P-Value
mmu05168	Herpes simplex infection	7.01277e-15
mmu04514	Cell adhesion molecules (CAMs)	7.01277e-15
mmu04145	Phagosome	3.44377e-14
mmu05150	Staphylococcus aureus infection	2.55833e-13
mmu05164	Influenza A	2.0136e-09
mmu05152	Tuberculosis	3.2913e-09
mmu05140	Leishmaniasis	5.21133e-09
mmu04380	Osteoclast differentiation	4.19545e-08
mmu04612	Antigen processing and presentation	4.19545e-08
mmu05416	Viral myocarditis	2.29388e-07
mmu05160	Hepatitis C	3.30857e-07
mmu05162	Measles	3.65281e-07
mmu05166	HTLV-I infection	1.23689e-06
mmu05330	Allograft rejection	3.75078e-06
mmu05332	Graft-versus-host disease	3.75078e-06
mmu05322	Systemic lupus erythematosus	3.75078e-06
mmu04940	Type I diabetes mellitus	6.18822e-06
mmu05320	Autoimmune thyroid disease	1.74392e-05
mmu05323	Rheumatoid arthritis	8.90751e-05
mmu04668	TNF signaling pathway	0.00014492
mmu05145	Toxoplasmosis	0.000149063
mmu05134	Legionellosis	0.000223623
mmu04670	Leukocyte transendothelial migration	0.00024526
mmu05142	Chagas disease (American trypanosomiasis)	0.000351755
mmu04060	Cytokine-cytokine receptor interaction	0.000432004
mmu04911	Insulin secretion	0.000432004
mmu04640	Hematopoietic cell lineage	0.000435774
mmu04610	Complement and coagulation cascades	0.000435774
mmu05133	Pertussis	0.000821712
mmu04970	Salivary secretion	0.00111166
mmu04933	AGE-RAGE signaling pathway in diabetic complications	0.0012992
mmu05203	Viral carcinogenesis	0.00172427
mmu04024	cAMP signaling pathway	0.0027729
mmu03010	Ribosome	0.00364863
mmu05020	Prion diseases	0.00386892
mmu04713	Circadian entrainment	0.00386892
mmu04020	Calcium signaling pathway	0.00434928
mmu04620	Toll-like receptor signaling pathway	0.00440926
mmu05321	Inflammatory bowel disease (IBD)	0.0060038
mmu05146	Amoebiasis	0.00714582
mmu04210	Apoptosis	0.00714582
mmu04540	Gap junction	0.00714582
mmu04062	Chemokine signaling pathway	0.00714582
mmu04725	Cholinergic synapse	0.00750244
mmu05169	Epstein-Barr virus infection	0.00751588
mmu04974	Protein digestion and absorption	0.00834024
mmu04672	Intestinal immune network for IgA production	0.00834024
mmu05310	Asthma	0.0087973
mmu04622	RIG-I-like receptor signaling pathway	0.010042
mmu04918	Thyroid hormone synthesis	0.0112494
mmu04930	Type II diabetes mellitus	0.0126094
mmu05144	Malaria	0.0126094
mmu05014	Amyotrophic lateral sclerosis (ALS)	0.014467
mmu04630	Jak-STAT signaling pathway	0.0145519
mmu00051	Fructose and mannose metabolism	0.0203284
mmu04512	ECM-receptor interaction	0.0206186
mmu05340	Primary immunodeficiency	0.0234897
mmu05161	Hepatitis B	0.024941
mmu05414	Dilated cardiomyopathy	0.0281644
mmu04623	Cytosolic DNA-sensing pathway	0.0288633
mmu04261	Adrenergic signaling in cardiomyocytes	0.0291876
mmu04650	Natural killer cell mediated cytotoxicity	0.0291876
mmu04921	Oxytocin signaling pathway	0.0353674
mmu04978	Mineral absorption	0.042009
mmu04151	PI3K-Akt signaling pathway	0.0474689
mmu04662	B cell receptor signaling pathway	0.0479596

## Sheet: KEGG (upregulated DEGs)
KEGG enrichment of the upregulated DEGs
ID	Term	Adjusted P-Value
mmu05168	Herpes simplex infection	6.03408e-22
mmu04145	Phagosome	2.8143e-19
mmu05150	Staphylococcus aureus infection	5.21993e-18
mmu04514	Cell adhesion molecules (CAMs)	5.91886e-17
mmu05164	Influenza A	6.70976e-14
mmu05140	Leishmaniasis	7.92899e-13
mmu05152	Tuberculosis	1.11065e-12
mmu04380	Osteoclast differentiation	1.3828e-12
mmu04612	Antigen processing and presentation	3.57717e-12
mmu05416	Viral myocarditis	3.77307e-11
mmu05166	HTLV-I infection	3.30362e-10
mmu05160	Hepatitis C	2.40914e-09
mmu05162	Measles	2.65203e-09
mmu05330	Allograft rejection	3.88608e-09
mmu05332	Graft-versus-host disease	3.88608e-09
mmu04940	Type I diabetes mellitus	6.93478e-09
mmu05320	Autoimmune thyroid disease	2.10581e-08
mmu05323	Rheumatoid arthritis	2.05247e-07
mmu04668	TNF signaling pathway	2.11349e-07
mmu05145	Toxoplasmosis	2.18538e-07
mmu04610	Complement and coagulation cascades	2.49676e-06
mmu05322	Systemic lupus erythematosus	2.71717e-06
mmu05133	Pertussis	7.80377e-06
mmu05142	Chagas disease (American trypanosomiasis)	8.77536e-06
mmu04060	Cytokine-cytokine receptor interaction	1.66274e-05
mmu05134	Legionellosis	1.71345e-05
mmu04640	Hematopoietic cell lineage	2.04445e-05
mmu05169	Epstein-Barr virus infection	2.18206e-05
mmu05203	Viral carcinogenesis	3.58286e-05
mmu04620	Toll-like receptor signaling pathway	5.14576e-05
mmu04062	Chemokine signaling pathway	0.000158657
mmu04670	Leukocyte transendothelial migration	0.000165165
mmu05020	Prion diseases	0.00016718
mmu05321	Inflammatory bowel disease (IBD)	0.000168204
mmu04630	Jak-STAT signaling pathway	0.000168204
mmu04622	RIG-I-like receptor signaling pathway	0.000362071
mmu04210	Apoptosis	0.000362071
mmu04672	Intestinal immune network for IgA production	0.00044606
mmu05161	Hepatitis B	0.000475791
mmu05310	Asthma	0.000774382
mmu04623	Cytosolic DNA-sensing pathway	0.00209784
mmu04933	AGE-RAGE signaling pathway in diabetic complications	0.00244289
mmu05340	Primary immunodeficiency	0.00245876
mmu04144	Endocytosis	0.00246725
mmu04662	B cell receptor signaling pathway	0.0037665
mmu04650	Natural killer cell mediated cytotoxicity	0.00496334
mmu04810	Regulation of actin cytoskeleton	0.00511444
mmu05144	Malaria	0.00626459
mmu05202	Transcriptional misregulation in cancer	0.00714684
mmu04068	FoxO signaling pathway	0.00778114
mmu04621	NOD-like receptor signaling pathway	0.0104117
mmu04064	NF-kappa B signaling pathway	0.0127719
mmu04660	T cell receptor signaling pathway	0.0130308
mmu04918	Thyroid hormone synthesis	0.0181438
mmu00051	Fructose and mannose metabolism	0.0181438
mmu04917	Prolactin signaling pathway	0.0204007
mmu04151	PI3K-Akt signaling pathway	0.0216171
mmu04142	Lysosome	0.022692
mmu04970	Salivary secretion	0.022692
mmu05132	Salmonella infection	0.022692
mmu04152	AMPK signaling pathway	0.0258735
mmu04978	Mineral absorption	0.0326463
mmu04010	MAPK signaling pathway	0.0335466
mmu04666	Fc gamma R-mediated phagocytosis	0.0340626
mmu04024	cAMP signaling pathway	0.0352806
mmu04713	Circadian entrainment	0.0434965

## Sheet: KEGG (downregulated DEGs)
KEGG enrichment of the downregulated DEGs
ID	Term	P-Value	Adjusted P-Value
mmu04911	Insulin secretion	1.75805e-05	0.0025316
mmu03010	Ribosome	7.12749e-05	0.00513179
mmu05014	Amyotrophic lateral sclerosis (ALS)	0.00013915	0.0066792
mmu04512	ECM-receptor interaction	0.00104574	0.0302867
mmu04540	Gap junction	0.00121542	0.0302867
mmu04020	Calcium signaling pathway	0.00139741	0.0302867
mmu04974	Protein digestion and absorption	0.00147227	0.0302867
mmu04725	Cholinergic synapse	0.00378324	0.0680983
mmu04970	Salivary secretion	0.00575884	0.0894113
mmu05033	Nicotine addiction	0.00620912	0.0894113
mmu04024	cAMP signaling pathway	0.00914032	0.110088
mmu00604	Glycosphingolipid biosynthesis - ganglio series	0.00939588	0.110088
mmu05034	Alcoholism	0.0104444	0.110088
mmu04930	Type II diabetes mellitus	0.0110602	0.110088
mmu00330	Arginine and proline metabolism	0.0116368	0.110088
mmu04713	Circadian entrainment	0.012232	0.110088
mmu04921	Oxytocin signaling pathway	0.0142469	0.12068
mmu05146	Amoebiasis	0.018243	0.144874
mmu04721	Synaptic vesicle cycle	0.0191153	0.144874
mmu04724	Glutamatergic synapse	0.0204027	0.146558
mmu04514	Cell adhesion molecules (CAMs)	0.021373	0.146558
mmu04611	Platelet activation	0.025177	0.164795
mmu04971	Gastric acid secretion	0.0287074	0.178106
mmu05412	Arrhythmogenic right ventricular cardiomyopathy (ARVC)	0.0296844	0.178106
mmu04260	Cardiac muscle contraction	0.0359101	0.205546
mmu00410	beta-Alanine metabolism	0.0371124	0.205546
mmu00040	Pentose and glucuronate interconversions	0.0431138	0.229163
mmu05322	Systemic lupus erythematosus	0.0450206	0.229163
mmu05414	Dilated cardiomyopathy	0.0476491	0.229163
mmu04261	Adrenergic signaling in cardiomyocytes	0.0477422	0.229163
