# Supplementary material for: Transcriptomic analysis highlights cochlear inflammation associated with age-related hearing loss in C57BL/6 mice using next generation sequencing
Source: PeerJ. 2020 Aug 19;8:e9737. doi: 10.7717/peerj.9737 (PMC7443093; doi:10.7717/peerj.9737)
Supplement: Supplemental Information 2 [file peerj-08-9737-s002.xlsx]

## Sheet: figure 1
Cq value		Gene
		GAPDH	Cxcl13	Irf7	Ccl2			GAPDH	ZBP1			GAPDH	Alox15
Sample	young 1	20.36	30.73	28.63	28.69		young 1	20.11	32.29		young 1	20.34	-
	young 1	20.37	30.1	28.17	28.73		young 1	20.1	31.4		young 1	20.43	33.26
	young 1	20.37	30.55	28.99	28.29		young 1	20.39	31.11		young 1	20.34	34.06
	young 2	20.07	29.94	28.56	28.64		young 2	19.84	31.49		young 2	20.14	33.29
	young 2	20.24	30.42	28.67	28.85		young 2	19.9	31.25		young 2	20.15	33.87
	young 2	20.14	29.76	28.68	28.89		young 2	19.79	31.59		young 2	20.13	-
	young 3	20.72	30.53	28.55	28.66		young 3	20.47	30.16		young 3	20.78	-
	young 3	20.67	30.31	28.23	28.66		young 3	20.48	31.63		young 3	20.66	34.03
	young 3	20.66	30.61	28.24	28.85		young 3	20.43	30.64		young 3	20.67	34.03
	old 1	20.49	25.98	27.1	26.54		old 1	20.24	29.18		old 1	20.55	31.93
	old 1	20.52	25.86	27.14	26.17		old 1	20.27	29.55		old 1	20.52	31.91
	old 1	20.65	26.04	27.14	26.37		old 1	20.23	29		old 1	20.53	31.92
	old 2	20.84	26.23	27.88	26.13		old 2	19.96	29.35		old 2	20.83	32.83
	old 2	20.84	26.11	28.03	26.2		old 2	19.95	28.57		old 2	20.82	33.19
	old 2	20.87	26.15	28.13	26.62		old 2	19.97	29.06		old 2	20.78	32.85
	old 3	20.34	25.08	26.9	25.11		old 3	20.64	29.78		old 3	20.32	31.55
	old 3	20.39	25.21	26.93	25.35		old 3	20.68	28.84		old 3	20.38	31.04
	old 3	20.34	25.08	26.76	25.22		old 3	20.64	29.51		old 3	20.59	31.48

## Sheet: figure 5
Cq value
		Gene
		Ccl2	Zbp1	Irf7	Mlkl	Cebpb	Fos	GAPDH
Sample	control 1	21.82	35	27.11	25.54	23.54	23.44	15.55
	control 1	21.73	-	27.08	25.46	23.63	23.29	15.74
	control 1	21.89	35	27.12	25.62	23.6	23.44	15.66
	H2O2 1	20.53	31.67	25.15	23.88	21.61	21.84	14.93
	H2O2 1	20.6	31.7	25.08	24.05	21.27	21.75	14.94
	H2O2 1	20.55	31.7	25.06	24.01	21.35	21.83	14.95
	control 2	22.06	35	27.35	25.81	23.88	23.61	16.11
	control 2	22.34	35	27.48	26.68	23.92	23.72	16.04
	control 2	22.45	35	27.43	26.07	23.69	23.58	16.05
	H2O2 2	20.92	32.24	25.54	24.56	21.64	22.04	15.3
	H2O2 2	20.88	33.17	25.33	24.62	21.61	21.98	15.23
	H2O2 2	20.8	31.37	25.53	24.63	21.45	22.04	15.33
	control 3	22.08	35	27.28	25.54	23.9	23.46	15.6
	control 3	22	35	27.51	25.59	24.08	23.49	15.61
	control 3	22.06	35	27.26	25.59	24.33	23.46	15.55
	H2O2 3	20.6	-	25.08	24.12	22	21.8	14.8
	H2O2 3	20.61	32.3	25.08	24.06	22.04	21.77	14.8
	H2O2 3	20.65	32.18	25.04	24.07	21.94	21.75	14.84
